# Supplementary material
Source: Springer Nature journal article supplement (https://www.springermedizin.de/resource/supplementary/12961_2012_244_MOESM4_ESM.pdf/9570866)
Supplement: MOESM4 [file 9570866]

| OBJECTIVES                                                   | A             | P                 | B        |
|--------------------------------------------------------------|---------------|-------------------|----------|
| 1. Build capacity (7)                                        | 20,23,54,57   | -                 | 24,35,40 |
| 2. Increase understanding/awareness of issues (6)            | 23            | 43,47,52          | 21,40    |
| 3. Develop guidelines (6)                                    | -             | 11,41,43,46,49,52 | -        |
| 4. Facilitate dynamic knowledge acquisition and transfer (6) | 4,17-19,23,49 | -                 | -        |
| 5. Build strategies for solving sector issues (4)            | -             | 2                 | 24,29,50 |
| 6. Networking (3)                                            | 4,54          | -                 | 24       |
| 7. Foster intra/intergovernmental communication (2)          | -             | 35,41             | -        |
| 8. Disseminate research and illuminate gaps (2)              | 58            | -                 | 50       |
| Not Reported (NR) = 17                                       |               |                   |          |

| PURPOSE OF EVALUATION                                                         | A                 | P               | B          |
|-------------------------------------------------------------------------------|-------------------|-----------------|------------|
| 1. Assess general conference performance/participant reactions (10)           | 4,23,53,57        | 35,37,39,41     | 8,22       |
| 2. Assess conference impact on research/practice (10)                         | 17,20,23,54       | -               | 5,21-24,50 |
| 3. Assess conference outputs' impact on policy changes/sector development (9) | -                 | 2,6,25,43,46,52 | 10,26,29   |
| 4. Determine publication rates of abstracts (8)                               | 30-32,45,48,55,58 | -               | -          |
| 5. Assess knowledge acquisition/exchange (7)                                  | 17-19,51,53       | -               | 21,24      |
| 6. Assess quality of conference deliverables (3)                              | -                 | 6,32,52         | -          |
| 7. Assess conference equity (1)                                               | 42                | -               | -          |
| NR = 4                                                                        |                   |                 |            |

| EVALUATION METHODS                                        | A                    | P                  | B        |
|-----------------------------------------------------------|----------------------|--------------------|----------|
| 1. Research/policy documents search (12)                  | 30-32,44,45,48,55,58 | 52                 | 10,29,50 |
| 2. Interviews/questionnaires with qualitative coding (11) | 17-19,23,28          | 25,27,52           | 5,21,24  |
| 3. Qualitative case study (9)                             | 23,57                | 2,6,11,32,35,43,46 | -        |
| 4. Questionnaire with quantitative coding (8)             | 4,20,28,51           | 41                 | 8,22     |
| 5. Questionnaire – unknown/mixed methods (5)              | 54                   | 49,53              | 5,24     |
| NR = 1                                                    |                      |                    |          |

| INDICATORS OF SUCCESS                                     | A                 | P           | B              |
|-----------------------------------------------------------|-------------------|-------------|----------------|
| 1. Publication rates (8)                                  | 30-32,45,48,55,58 | -           | -              |
| 2. Use of knowledge acquired in new research/practice (8) | 20                | 43,52       | 21,24,29,35,50 |
| 3. Agenda/policy changes based on conference outputs (6)  | -                 | 25,27,43,52 | 10,29          |
| 4. Intention to act (3)                                   | 17,20             | -           | 5              |
| 5. Participant satisfaction (3)                           | 54                | 41          | 8              |
| 6. Attendance trends/Intention to return (3)              | 44,54             | -           | 8              |
| 7. Quality of conference reports (1)                      | -                 | 2           | -              |
| 8. Conference recommendations incorporated into law (1)   | -                 | 43          | -              |
| NR = 8                                                    |                   |             |                |

| THEORIES                           | A         | P  | B |
|------------------------------------|-----------|----|---|
| 1. New Learning (3)                | 17-19     | -  | - |
| 2. Theory of Planned Behaviour (1) | 20        | -  | - |
| 3. Theory of Reasoned Action (1)   | -         | -  | 5 |
| 4. Social Cognitive Theory (1)     | 20        | -  | - |
| 5. Social Capital Theory (1)       | 51        | -  | - |
| 6. Constructivism (1)              | -         | 52 | - |
| MODELS                             |           |    |   |
| 1. Communities of Practice (4)     | 17-19, 49 | -  | - |
| 2. NGO engagement model (1)        | -         | 39 | - |
| NR = 34                            |           |    |   |
